# Supplementary material
Source: Springer Nature journal article supplement (https://www.springermedizin.de/resource/supplementary/12889_2010_2210_MOESM1_ESM.pdf/9484972)
Supplement: MOESM1 [file 9484972]

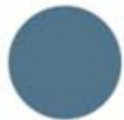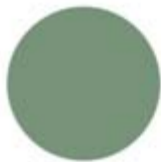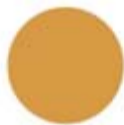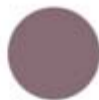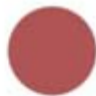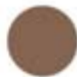

**Alarmed**  
18%

**Concerned**  
33%

**Cautious**  
19%

**Disengaged**  
12%

**Doubtful**  
11%

**Dismissive**  
7%

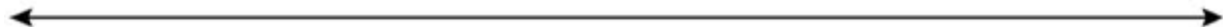

Highest Belief in Global Warming  
Most Concerned  
Most Motivated

Lowest Belief in Global Warming  
Least Concerned  
Least Motivated

n=2,129
